# Supplementary material
Source: PubMed Central journal article supplement (PMC4403870)

A

Serum P1NP

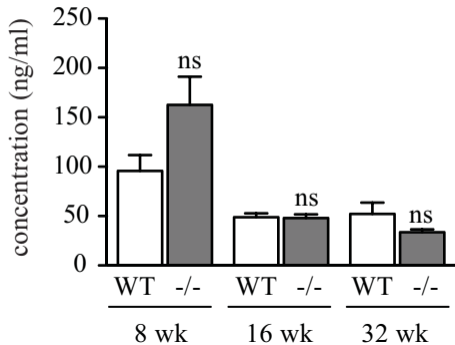

B

Serum osteocalcin

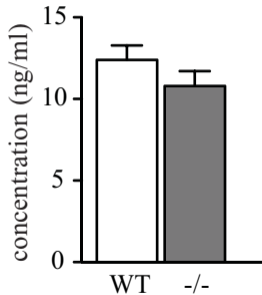

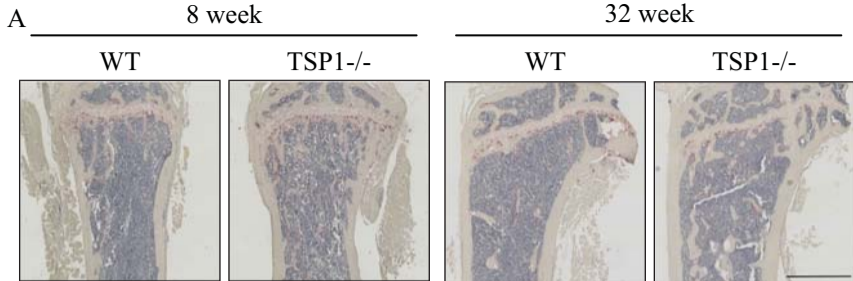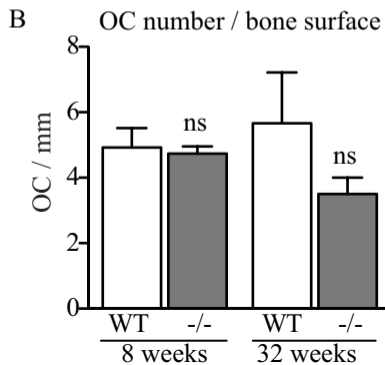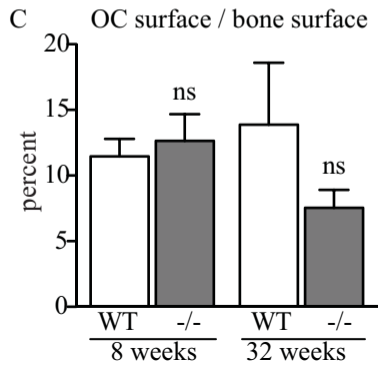

no treatment

IgM isotype  
control

TSP1 neutralizing  
antibody (A4.1)

WT

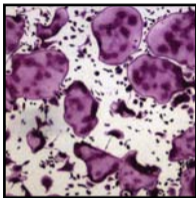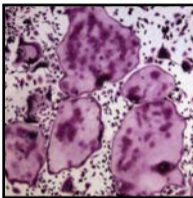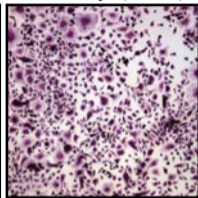

TSP1<sup>-/-</sup>

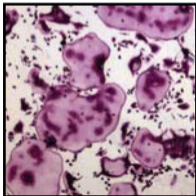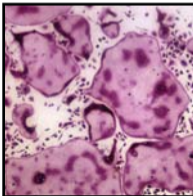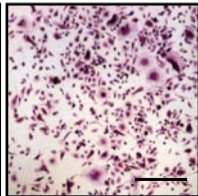

Supplement: NIHMS638052-supplement-Supp_FigureS1-S3.pdf [file NIHMS638052-supplement-Supp_FigureS1-S3.pdf]
